# Supplementary material
Source: PubMed Central journal article supplement (PMC6537770)
Supplement: jamaoncol-5-1188-s001.pdf [file jamaoncol-5-1188-s001.pdf]

## Supplementary Online Content

Saluja R, Everest L, Cheng S, Cheung M, Chan KKW. Assessment of whether the American Society of Clinical Oncology's Value Framework and the European Society for Medical Oncology's Magnitude of Clinical Benefit Scale measure absolute or relative clinical survival benefit. *JAMA Oncol*. Published online May 16, 2019.  
doi:10.1001/jamaoncol.2019.0818

**eTable 1.** Characteristics of Included Studies

**eTable 2.** Framework Scores and RMST Difference Values

**eTable 3.** Mean RMST Differences (Months) for ESMO-PMCBGs Ranging From 1 to 4

**eTable 4.** ICC Values

**eTable 5.** Primary Analysis With OS and PFS Data Split

**eFigure 1.** Distribution of ASCO-CBS

**eFigure 2.** Distribution of ESMO-PMCBG

**eFigure 3.** Spearman Correlations of ASCO Clinical Benefit Score (ASCO-CBS) and ESMO Preliminary Magnitude of Clinical Benefit Grade (ESMO-PMCBG) vs Median Survival Difference

This supplementary material has been provided by the authors to give readers additional information about their work.

**eTable 1. Characteristics of Included Studies**

| First Author | FDA Notification Year | Indication                                      | Therapy           | Therapy Type | Primary Endpoint | HR OS | HR PFS | Median OS Difference (months) | Median PFS Difference (months) |
|--------------|-----------------------|-------------------------------------------------|-------------------|--------------|------------------|-------|--------|-------------------------------|--------------------------------|
| Amadori      | 2016                  | Acute Myeloid Leukemia                          | Gemtuzumab        | T            | OS               | 0.69  | NR     | 1.30                          | NR                             |
| Attal        | 2012                  | Myeloma                                         | Lenalidomide      | T            | PFS              | 1.25  | 0.50   | NR                            | 18.00                          |
| Bang         | 2010                  | Gastric Cancer                                  | Trastuzumab       | T + C        | OS               | 0.74  | 0.71   | 2.70                          | 1.20                           |
| Baselga      | 2012                  | Advanced Breast Cancer                          | Everolimus        | T            | PFS              | NR    | 0.36   | NR                            | 6.50                           |
| Baselga      | 2012                  | Advanced Breast Cancer                          | Pertuzumab        | T            | PFS              | 0.64  | 0.62   | NR                            | 6.10                           |
| Bellmunt     | 2017                  | Advanced Urothelial Cancer                      | Pembrolizumab     | I            | OS/PFS           | 0.71  | 0.98   | 2.90                          | -1.20                          |
| Bennouna     | 2013                  | Metastatic Colorectal Cancer                    | Bevacizumab       | T            | OS               | 0.81  | 0.67   | 1.40                          | 1.6                            |
| Borghaei     | 2015                  | Non-Small Cell Lung Cancer                      | Nivolumab         | I            | OS               | 0.73  | 0.92   | 2.8                           | 1.9                            |
| Brahmer      | 2015                  | Non-Small Cell Lung Cancer                      | Nivolumab         | I            | OS               | 0.59  | 0.62   | 3.2                           | 0.7                            |
| Brose        | 2014                  | Metastatic Thyroid Cancer                       | Sorafenib         | T            | PFS              | 0.80  | 0.59   | NR                            | 5.00                           |
| Bruix        | 2017                  | Hepatocellular Carcinoma                        | Regorafenib       | T            | OS               | 0.63  | 0.46   | 2.80                          | 1.60                           |
| Burger       | 2011                  | Advanced Ovarian Cancer                         | Bevacizumab       | T            | PFS              | 0.92  | 0.72   | 0.40                          | 3.80                           |
| Caplin       | 2014                  | Entero-pancreatic Endocrine Tumours             | Lanreotide        | T            | PFS              | NR    | 0.47   | NR                            | 9.00                           |
| Cappuzzo     | 2010                  | Non-Small Cell Lung Cancer                      | Erlotinib         | T            | PFS              | 0.81  | 0.69   | 1.00                          | 0.29                           |
| Chapman      | 2012                  | Metastatic Melanoma                             | Vemurafenib       | T            | OS/PFS           | 0.37  | 0.26   | 2.20                          | 3.70                           |
| Chouieri     | 2015                  | Metastatic Renal Cell Carcinoma                 | Cabozantinib      | T            | PFS              | 0.67  | 0.58   | -2.80                         | 3.60                           |
| Cicenas      | 2016                  | Non-Small Cell Lung Cancer                      | Erlotinib         | T            | OS               | 1.02  | 0.94   | 0.20                          | 0.23                           |
| Ciuleanu     | 2009                  | Non-Small Cell Lung Cancer                      | Pemetrexed        | C            | PFS              | 0.79  | 0.60   | 2.80                          | 2.00                           |
| Cortes       | 2011                  | Metastatic Breast Cancer                        | Eribulin mesylate | C            | OS               | 0.81  | 0.87   | 2.50                          | 1.50                           |
| Cristofanill | 2016                  | Metastatic Breast Cancer                        | Palbociclib       | T            | PFS              | NR    | 0.46   | NR                            | 4.90                           |
| De Bono      | 2010                  | Metastatic Castration Resistant Prostate Cancer | Cabazitaxel       | C            | OS               | 0.70  | 0.74   | 2.40                          | 1.40                           |
| Demetri      | 2013                  | Gastrointestinal Stromal Tumors                 | Regorafenib       | T            | PFS              | 0.77  | 0.27   | NA                            | 3.90                           |
| Demetri      | 2016                  | Leiomyosarcoma                                  | Trabectedin       | C            | OS               | 0.87  | 0.55   | 0.50                          | 2.70                           |
| Dimopoulos   | 2007                  | Multiple Myeloma                                | Lenalidomide      | T            | TTP              | 0.66  | 0.35   | 14.50                         | 6.60                           |
| Dimopoulos   | 2016                  | Multiple Myeloma                                | Daratumumab       | I            | PFS              | NR    | 0.37   | NR                            | 2.50                           |
| Eisenberger  | 2017                  | Metastatic Castration Resistant Prostate Cancer | Cabazitaxel       | C            | OS               | 1.02  | 1.10   | NR                            | NR                             |
| Elisei       | 2013                  | Medullary Thyroid Cancer                        | Cabozantinib      | T            | PFS              | NR    | 0.28   | NA                            | 7.20                           |
| Ferris       | 2016                  | Metastatic Head and Neck Carcinoma              | Nivolumab         | I            | OS               | 0.70  | 0.89   | 2.40                          | 0.30                           |
| Finn         | 2016                  | Metastatic Breast Cancer                        | Palbociclib       | T            | PFS              | NR    | 0.58   | NR                            | 10.30                          |

|            |      |                                                 |                     |   |        |      |      |      |       |
|------------|------|-------------------------------------------------|---------------------|---|--------|------|------|------|-------|
| Fizazi     | 2012 | Metastatic Castration Resistant Prostate Cancer | Abiraterone         | H | OS     | 0.74 | 0.66 | 4.60 | 1.90  |
| Flaherty   | 2012 | Metastatic Melanoma                             | Trametinib          | T | PFS    | 0.54 | 0.45 | NR   | 3.30  |
| Fuchs      | 2013 | Advanced Gastric Cancer                         | Ramucirumab         | T | OS     | 0.78 | 0.48 | 1.40 | 0.80  |
| Furman     | 2014 | Chronic Lymphocytic Leukemia                    | Idelalisib          | T | PFS    | 0.28 | 0.15 | NA   | 8.5   |
| Garon      | 2014 | Non-Small Cell Lung Cancer                      | Ramucirumab         | T | OS     | 0.86 | 0.76 | 1.40 | 1.50  |
| Goede      | 2014 | Chronic Lymphocytic Leukemia                    | Obinutuzumab        | T | PFS    | 0.41 | 0.18 | NA   | 15.60 |
| Grothey    | 2013 | Metastatic Colorectal Cancer                    | Regorafenib         | T | OS     | 0.77 | 0.49 | 1.40 | 0.20  |
| Hallek     | 2010 | Chronic B-Cell Lymphocytic Leukemia             | Rituximab           | T | PFS    | 0.67 | 0.48 | NR   | 19.10 |
| Hauschild  | 2012 | Metastatic Melanoma                             | Dabrafenib          | T | PFS    | 0.61 | 0.30 | NR   | 2.40  |
| Herbst     | 2016 | Non-Small Cell Lung Cancer                      | Pembrolizumab       | T | PFS    | 0.61 | 0.79 | 1.90 | 0.10  |
| Hillmen    | 2013 | Chronic Lymphocytic Leukemia                    | Ofatumumab          | T | PFS    | 0.91 | 0.57 | NR   | 9.30  |
| Hodi       | 2010 | Metastatic Melanoma                             | Ipilimumab          | I | OS     | 0.68 | 0.81 | 3.60 | 0.00  |
| Hortobagyi | 2012 | Advanced Breast Cancer                          | Ribociclib          | T | PFS    | NR   | 0.56 | NR   | 7.30  |
| Hudes      | 2007 | Metastatic Renal Cell Carcinoma                 | Temsozilumab        | T | OS     | 0.73 | NR   | 1.10 | 1.60  |
| Johnston   | 2010 | Metastatic Breast Cancer                        | Lapatinib           | T | PFS    | NR   | 0.86 | NR   | 1.10  |
| Jonker     | 2007 | Metastatic Colorectal Cancer                    | Cetuximab           | T | OS     | 0.77 | 0.68 | 1.50 | 0.10  |
| Kantarjian | 2016 | Acute Lymphoblastic Leukemia                    | Inotuzumab          | T | OS     | 0.77 | 0.45 | 0.60 | 3.20  |
| Kantarjian | 2017 | Acute Lymphoblastic Leukemia                    | Blinatumomab        | T | OS     | 0.71 | NR   | 3.70 | NR    |
| Larkin     | 2014 | Metastatic Melanoma                             | Cobimetinib         | T | OS/PFS | 0.65 | 0.51 | NA   | 3.7   |
| Llovet     | 2008 | Hepatocellular Carcinoma                        | Sorafenib           | T | OS/PFS | 0.69 | 1.08 | 2.8  | -0.2  |
| Long       | 2015 | Melanoma                                        | Trametinib          | T | PFS    | 0.71 | 0.67 | 6.4  | 2.2   |
| Lonial     | 2015 | Multiple Myeloma                                | Elotuzumab          | T | PFS    | NR   | 0.70 | NA   | 4.5   |
| Marcus     | 2017 | Non-Hodgkin's Lymphoma                          | Obinutuzumab        | T | PFS    | 0.75 | 0.66 | NR   | NR    |
| Mayer      | 2015 | Metastatic Colorectal Cancer                    | TAS-102             | C | OS     | 0.68 | 0.48 | 1.80 | 0.30  |
| Miller     | 2007 | Metastatic Breast Cancer                        | Bevacizumab         | T | PFS    | 0.88 | 0.60 | 1.50 | 5.90  |
| Mirza      | 2016 | Ovarian Cancer                                  | Niraparib           | T | PFS    | NR   | 0.27 | NR   | 5.60  |
| Mok        | 2016 | Non-Small Cell Lung Cancer                      | Osimertinib         | T | PFS    | NR   | 0.30 | NR   | 5.70  |
| Moreau     | 2016 | Multiple Myeloma                                | Ixazomib            | T | PFS    | NR   | 0.74 | NR   | 5.90  |
| Moskowitz  | 2015 | Hodgkin's Lymphoma                              | Brentuximab Vedotin | T | PFS    | 1.15 | 0.57 | NR   | 18.80 |
| Motzer     | 2009 | Metastatic Renal Cell Carcinoma                 | Sunitinib           | T | PFS    | 0.65 | 0.42 | NR   | 6.00  |
| Motzer     | 2010 | Metastatic Renal Cell Carcinoma                 | Everolimus          | T | PFS    | 0.87 | 0.32 | 0.40 | 3.03  |
| Motzer     | 2015 | Metastatic Renal Cell Carcinoma                 | Nivolumab           | I | OS     | 0.73 | 0.88 | 5.40 | 0.20  |
| Orlowski   | 2007 | Multiple Myeloma                                | Doxorubicin         | C | TTP    | 0.71 | 0.59 | NR   | 2.80  |
| Palumbo    | 2016 | Multiple Myeloma                                | Daratumumab         | T | PFS    | NR   | 0.39 | NR   | 7.80  |
| Paz-Ares   | 2013 | Non-Small Cell Lung Cancer                      | Pemetrexed          | C | PFS    | 0.78 | 0.60 | 2.90 | 1.30  |
| Peters     | 2017 | Non-Small Cell Lung Cancer                      | Alectinib           | T | PFS    | 0.76 | 0.47 | NR   | 15.30 |
| Pfisterer  | 2006 | Ovarian cancer                                  | Gemcitabine         | C | PFS    | 0.96 | 0.72 | 0.70 | 2.8   |

|                 |      |                                                 |               |       |        |      |      |       |       |
|-----------------|------|-------------------------------------------------|---------------|-------|--------|------|------|-------|-------|
| Posner          | 2007 | Head and Neck Cancer                            | Docetaxel     | C     | OS     | 0.70 | 0.71 | 41.00 | 23.00 |
| Pujade-Lauraine | 2014 | Ovarian Cancer                                  | Avastin       | T     | PFS    | 0.85 | 0.48 | 3.30  | 3.30  |
| Pujade-Lauraine | 2017 | Ovarian Cancer                                  | Olaparib      | T     | PFS    | NR   | 0.30 | NR    | 13.60 |
| Raymond         | 2011 | Pancreatic Islet Cell Tumors                    | Sunitinib     | T     | PFS    | 0.41 | 0.42 | NR    | 5.90  |
| Reck            | 2016 | Non-Small Cell Lung Cancer                      | Nintedanib    | T     | PFS    | 0.94 | 0.79 | 1.00  | 1.30  |
| Rini            | 2011 | Metastatic Renal Cell Carcinoma                 | Axitinib      | T     | PFS    | NR   | 0.67 | NR    | 2.00  |
| Rittmeyer       | 2016 | Non-Small Cell Lung Cancer                      | Atezolizumab  | I     | OS     | 0.73 | 0.95 | 4.20  | -1.20 |
| Robert          | 2015 | Advanced Melanoma                               | Dabrafenib    | T     | OS     | 0.69 | 0.56 | 3.80  | 4.10  |
| Robert          | 2015 | Advanced Melanoma                               | Pembrolizumab | I     | OS/PFS | 0.69 | 0.58 | NR    | 1.30  |
| Rosell          | 2012 | Non-Small Cell Lung Cancer                      | Tarceva       | T     | PFS    | 1.04 | 0.37 | -0.20 | 4.20  |
| Ryan            | 2013 | Metastatic Castration Resistant Prostate Cancer | Abiraterone   | H     | OS/PFS | 0.81 | 0.53 | 4.4   | 8.20  |
| Salles          | 2012 | Follicular Lymphoma                             | Rituximab     | T     | PFS    | 0.87 | 0.55 | NR    | 5.70  |
| San Miguel      | 2008 | Multiple Myeloma                                | Bortezomib    | T     | PFS    | 0.70 | NR   | 13.3  | NR    |
| San-Miguel      | 2014 | Multiple Myeloma                                | Panobinostat  | T     | PFS    | 0.87 | 0.63 | 3.25  | 3.91  |
| Scher           | 2012 | Metastatic Castration Resistant Prostate Cancer | Enzalutamide  | H     | OS     | 0.63 | 0.40 | 13.60 | 2.90  |
| Schlumberger    | 2015 | Thyroid Cancer                                  | Lenvatinib    | T     | PFS    | 0.62 | 0.21 | NR    | 14.70 |
| Schoffski       | 2016 | Soft Tissue Sarcoma                             | Eribulin      | C     | OS     | 0.77 | 0.88 | 2.00  | 0.00  |
| Sehn            | 2016 | Non-Hodgkin's Lymphoma                          | Obinutuzumab  | T     | PFS    | 0.82 | 0.52 | NR    | 33.10 |
| Sequist         | 2013 | Non-Small Cell Lung Cancer                      | Afatinib      | T     | PFS    | NR   | 0.58 | NR    | 4.64  |
| Shaw            | 2013 | Non-Small Cell Lung Cancer                      | Crizotinib    | T     | PFS    | 1.02 | 0.49 | -2.50 | 4.70  |
| Sledge          | 2017 | Advanced Breast Cancer                          | Abemaciclib   | T     | PFS    | NR   | 0.55 | NR    | 10.20 |
| Soria           | 2017 | Non-small Cell Lung Cancer                      | Ceritinib     | T     | PFS    | 0.73 | 0.55 | 7.80  | 8.50  |
| Sternberg       | 2010 | Metastatic Renal Cell Carcinoma                 | Pazopanib     | T     | PFS    | NR   | 0.46 | NR    | 5.00  |
| Stewart         | 2014 | Multiple Myeloma                                | Carfilzomib   | T     | PFS    | 0.79 | 0.69 | 0.00  | 8.70  |
| Stone           | 2017 | Acute Myeloid Leukemia                          | Midostaurin   | T     | OS     | 0.78 | NR   | 49.10 | NR    |
| Tabernero       | 2015 | Metastatic Colorectal Cancer                    | Ramucirumab   | T     | OS     | 0.84 | 0.79 | 1.60  | 1.20  |
| Tewari          | 2014 | Advanced Cervical Cancer                        | Bevacizumab   | T     | OS     | 0.68 | NR   | 3.20  | NR    |
| Thatcher        | 2015 | Non-Small Cell Lung Cancer                      | Necitumumab   | T     | OS     | 0.84 | 0.85 | 1.60  | 0.20  |
| Van Cutsem      | 2007 | Metastatic Colorectal Cancer                    | Panitumumab   | T     | PFS    | 1.00 | 0.54 | 0.22  | 0.18  |
| Van Cutsem      | 2012 | Metastatic Colorectal Cancer                    | Aflibercept   | T     | OS     | 0.82 | 0.76 | 0.90  | 2.23  |
| Van der Graaf   | 2012 | Soft Tissue Sarcoma                             | Pazopanib     | T     | PFS    | 0.86 | 0.31 | 1.80  | 3.00  |
| Van Oers        | 2015 | Chronic Lymphocytic Leukemia                    | Ofatumumab    | T     | PFS    | 0.85 | 0.50 | NR    | 14.20 |
| Verma           | 2012 | Metastatic Breast Cancer                        | Trastuzumab   | T + C | OS/PFS | 0.68 | 0.65 | 5.80  | 3.20  |
| Vermorken       | 2007 | Head and Neck Cancer                            | Docetaxel     | C     | PFS    | 0.73 | 0.72 | 4.30  | 2.80  |
| Vermorken       | 2008 | Head and Neck Cancer                            | Cetuximab     | T     | OS     | 0.80 | 0.54 | 2.70  | 2.30  |

|             |      |                                     |             |   |        |      |      |      |       |
|-------------|------|-------------------------------------|-------------|---|--------|------|------|------|-------|
| Von Hoff    | 2013 | Metastatic Pancreatic Cancer        | Paclitaxel  | C | OS     | 0.72 | 0.69 | 1.80 | 1.80  |
| Wang-Gillam | 2016 | Metastatic Pancreatic Cancer        | Irinotecan  | C | OS     | 0.67 | 0.56 | 1.90 | 1.60  |
| Weber       | 2015 | Advanced Melanoma                   | Nivolumab   | I | OS/PFS | NR   | 0.82 | NR   | 0.43  |
| Wells       | 2012 | Metastatic Medullary Thyroid Cancer | Vandetanib  | T | PFS    | 0.89 | 0.46 | NR   | 10.70 |
| Wilke       | 2014 | Gastric Adenocarcinoma              | Ramucirumab | T | OS     | 0.81 | 0.64 | 2.20 | 1.50  |
| Yao         | 2016 | Neuroendocrine Tumors               | Everolimus  | T | PFS    | 0.64 | 0.48 | NR   | 8.50  |

T, Targeted Agent; C, Chemotherapy; I, Immunotherapy; H, Hormone therapy; OS, Overall survival; PFS, Progression-free survival; TTP, Time to progression; NR, Not Reported.

**eTable 2. Framework Scores and RMST Difference Values**

| Study              | ASCO-CBS |      |                    |           |                 | ESMO-PMCBG                  |     |                    |           |                 | RMST Difference (in months) |      |
|--------------------|----------|------|--------------------|-----------|-----------------|-----------------------------|-----|--------------------|-----------|-----------------|-----------------------------|------|
|                    | OS       | PFS  | Framework Endpoint | Framework | Framework + TOC | OS                          | PFS | Framework Endpoint | Framework | Framework + TOC | OS                          | PFS  |
| Amadori 2016       | 31.0     | NA   | OS                 | 31.0      | 51.0            | Not Scored – Hematology RCT |     |                    |           |                 | 2.48                        | NA   |
| Attal 2012         | -25.0    | 40.0 | OS                 | -25.0     | -25.0           | Not Scored – Hematology RCT |     |                    |           |                 | NA                          | 6.52 |
| Bang 2010          | 26.0     | 23.2 | OS                 | 26.0      | 26.0            | 3                           | 2   | OS                 | 3         | 3               | 2.70                        | 2.07 |
| Baselga 2012       | NA       | 51.2 | PFS                | 51.2      | 67.2            | NA                          | 3   | PFS                | 3         | 4               | NA                          | 3.30 |
| Baselga 2012       | 36.0     | 30.4 | OS                 | 36.0      | 52.0            | NA                          | 3   | PFS                | 3         | 4               | 2.50                        | 4.30 |
| Bellmunt 2017      | 29.0     | 1.6  | OS                 | 29.0      | 47.0            | 3                           | 1   | OS                 | 3         | 3               | 1.66                        | 0.63 |
| Bennouna 2013      | 19.0     | 26.4 | OS                 | 19.0      | 19.0            | 1                           | 3   | OS                 | 1         | 1               | 1.98                        | 1.66 |
| Borghaei 2015      | 27.0     | 6.4  | OS                 | 27.0      | 27.0            | 4                           | 1   | OS                 | 4         | 4               | 1.82                        | 1.20 |
| Brahmer 2015       | 41.0     | 30.4 | OS                 | 41.0      | 61.0            | 4                           | 2   | OS                 | 4         | 4               | 3.57                        | 2.28 |
| Brose 2014         | 20.0     | 32.8 | PFS                | 32.8      | 32.8            | NA                          | 3   | PFS                | 3         | 4               | 1.33                        | 3.76 |
| Burger 2011        | 8.5      | 22.6 | PFS                | 22.6      | 22.6            | 1                           | 1   | PFS                | 1         | 1               | 1.38                        | 2.00 |
| Bruix 2017         | 37.0     | 43.2 | OS                 | 37.0      | 57.0            | 4                           | 3   | OS                 | 4         | 4               | 3.32                        | 2.58 |
| Caplin 2014        | NA       | 42.4 | PFS                | 42.4      | 42.4            | NA                          | 3   | PFS                | 3         | 4               | -0.81                       | 3.15 |
| Cappuzzo 2010      | 19.0     | 24.8 | PFS                | 24.8      | 24.8            | 1                           | 2   | PFS                | 2         | 2               | 1.99                        | 1.47 |
| Chapman 2012       | 63.0     | 59.2 | PFS                | 59.2      | 75.2            | 3                           | 3   | OS                 | 3         | 3               | 1.30                        | 2.67 |
| Chouieri 2015      | 33.0     | 33.6 | OS                 | 33.0      | 49.0            | 1                           | 3   | PFS                | 3         | 3               | 1.09                        | 2.25 |
| Cicenas 2016       | -2.0     | 4.8  | OS                 | -2.0      | -2.0            | NA                          | NA  | NA                 | NA        | NA              | -0.24                       | 0.27 |
| Ciuleanu 2009      | 21.0     | 32.0 | PFS                | 32.0      | 48.0            | 3                           | 3   | PFS                | 3         | 3               | 2.52                        | 1.90 |
| Cristofanilli 2016 | NA       | 43.2 | PFS                | 43.2      | 59.2            | NA                          | 3   | PFS                | 3         | 4               | NA                          | 2.62 |
| Cortes 2011        | 19.0     | 10.4 | OS                 | 19.0      | 19.0            | 2                           | 1   | OS                 | 2         | 2               | 0.86                        | 0.55 |
| De Bono 2010       | 30.0     | 20.8 | OS                 | 30.0      | 30.0            | 2                           | 2   | OS                 | 2         | 2               | 2.41                        | 1.05 |

|                  |      |      |     |      |      |                             |    |     |    |    |       |       |
|------------------|------|------|-----|------|------|-----------------------------|----|-----|----|----|-------|-------|
| Demetri 2013     | 23.0 | 58.4 | PFS | 58.4 | 74.4 | NA                          | 3  | PFS | 3  | 3  | 0.32  | 2.01  |
| Dimopoulos 2007  | 34.0 | 52.0 | OS  | 34.0 | 34.0 | Not Scored – Hematology RCT |    |     |    |    | 2.84  | NA    |
| Dimopoulos 2016  | NA   | 50.4 | PFS | 50.4 | 50.4 | Not Scored – Hematology RCT |    |     |    |    | 2.82  | 3.28  |
| Demetri 2016     | 13.0 | 36.0 | OS  | 13.0 | 29.0 | 1                           | 3  | OS  | NA | NA | 0.24  | 2.02  |
| Eisenberger 2017 | -2.4 | -7.9 | OS  | -2.4 | -2.4 | NA                          | NA | NA  | NA | NA | -0.37 | -0.38 |
| Elisei 2013      | NA   | 57.6 | PFS | 57.6 | 57.6 | NA                          | 3  | PFS | 3  | 4  | NA    | 5.09  |
| Ferris 2016      | 30.0 | 8.8  | OS  | 30.0 | 50.0 | 3                           | 1  | OS  | 3  | 3  | 1.69  | 0.42  |
| Finn 2016        | NA   | 33.6 | PFS | 33.6 | 49.6 | NA                          | 3  | PFS | 3  | 4  | NA    | 4.67  |
| Fizazi 2012      | 26.0 | 27.2 | OS  | 26.0 | 26.0 | 4                           | 2  | OS  | 4  | 4  | 1.97  | NA    |
| Flaherty 2012    | 46.0 | 44.0 | PFS | 44.0 | 60.0 | NA                          | 3  | PFS | 3  | 3  | 0.69  | 2.09  |
| Fuchs 2013       | 22.4 | 41.4 | OS  | 22.4 | 42.4 | 1                           | 2  | OS  | 1  | 1  | 1.56  | 1.58  |
| Furman 2014      | 72.0 | 68.0 | OS  | 72.0 | 72.0 | Not Scored – Hematology RCT |    |     |    |    | 1.44  | 5.60  |
| Garon 2014       | 14.0 | 19.2 | OS  | 14.0 | 14.0 | 1                           | 1  | OS  | 1  | 1  | 1.48  | 1.20  |
| Goede 2014       | 59.0 | 65.6 | PFS | 65.6 | 65.6 | Not Scored – Hematology RCT |    |     |    |    | 2.86  | 11.14 |
| Grothey 2013     | 23.0 | 40.8 | OS  | 23.0 | 23.0 | 1                           | 2  | OS  | 1  | 1  | -0.08 | 1.21  |
| Hallek 2010      | 33.0 | 41.6 | OS  | 33.0 | 33.0 | Not Scored – Hematology RCT |    |     |    |    | 3.28  | 8.57  |
| Hauschild 2012   | 39.0 | 56.0 | PFS | 56.0 | 72.0 | NA                          | 3  | PFS | 3  | 3  | NA    | 2.09  |
| Herbst 2016      | 29.0 | 9.6  | OS  | 29.0 | 49.0 | 2                           | 1  | OS  | 2  | 2  | 1.74  | 0.70  |
| Hillmen 2013     | 9.0  | 34.4 | PFS | 34.4 | 50.4 | Not Scored – Hematology RCT |    |     |    |    | 1.40  | 6.02  |
| Hortobagyi 2012  | NA   | 35.2 | PFS | 35.2 | 35.2 | NA                          | 3  | PFS | 3  | 3  | NA    | 2.71  |
| Hodi 2010        | 32.0 | 15.2 | OS  | 32.0 | 52.0 | 4                           | 1  | OS  | 4  | 4  | 4.61  | 1.33  |
| Hudes 2007       | 27.0 | NA   | OS  | 27.0 | 43.0 | 1                           | NA | OS  | 1  | 1  | 0.73  | 1.42  |
| Johnston 2010    | NA   | 11.2 | PFS | 11.2 | 11.2 | NA                          | 1  | PFS | 1  | 1  | 2.92  | NA    |
| Jonker 2007      | 23.0 | 25.6 | PFS | 25.6 | 25.6 | 2                           | 2  | OS  | 2  | 2  | 1.33  | 0.47  |
| Kantarjian 2016  | 23.0 | 44.0 | OS  | 23.0 | 39.0 | Not Scored – Hematology RCT |    |     |    |    | 3.79  | 3.10  |
| Kantarjian 2017  | 29.0 | NA   | OS  | 29.0 | 49.0 | Not Scored – Hematology RCT |    |     |    |    | 1.72  | NA    |
| Larkin 2014      | 36.0 | 39.2 | OS  | 36.0 | 52.0 | NA                          | 3  | PFS | 3  | 3  | 0.89  | 1.94  |

|                      |       |      |     |       |       |                             |   |     |   |   |       |      |
|----------------------|-------|------|-----|-------|-------|-----------------------------|---|-----|---|---|-------|------|
| Llovet 2008          | 31.0  | -6.4 | OS  | 31.0  | 31.0  | 3                           | 1 | OS  | 3 | 3 | 1.44  | NA   |
| Long 2015            | 29.0  | 26.4 | OS  | 29.0  | 45.0  | 4                           | 2 | PFS | 2 | 2 | 2.33  | 3.30 |
| Lonial 2015          | NA    | 24.0 | PFS | 24.0  | 40.0  | Not Scored – Hematology RCT |   |     |   |   | NA    | 3.39 |
| Marcus 2017          | 25.0  | 27.2 | OS  | 25.0  | 25.0  | Not Scored – Hematology RCT |   |     |   |   | 0.75  | 3.09 |
| Mayer 2015           | 32.0  | 41.6 | OS  | 32.0  | 52.0  | 2                           | 2 | OS  | 2 | 2 | 1.79  | 1.45 |
| Miller 2007          | 12.0  | 32.0 | OS  | 12.0  | 28.0  | 1                           | 3 | PFS | 3 | 4 | 1.91  | 4.82 |
| Mirza 2016           | NA    | 58.4 | PFS | 58.4  | 89.0  | NA                          | 3 | PFS | 3 | 4 | NA    | 3.25 |
| Mok 2016             | NA    | 56.0 | PFS | 56.0  | 56.0  | NA                          | 3 | PFS | 3 | 4 | NA    | 3.65 |
| Moreau 2016          | NA    | 20.8 | PFS | 20.8  | 26.0  | Not Scored – Hematology RCT |   |     |   |   | NA    | 1.44 |
| Moskowitz 2015       | -15.0 | 34.4 | OS  | -15.0 | -15.0 | Not Scored – Hematology RCT |   |     |   |   | -0.71 | 8.81 |
| Motzer 2009          | 35.0  | 46.4 | PFS | 46.4  | 62.4  | NA                          | 3 | PFS | 3 | 3 | 2.45  | 2.66 |
| Motzer 2010          | 13.0  | 54.4 | PFS | 54.4  | 54.4  | 1                           | 3 | PFS | 3 | 3 | 0.36  | 2.52 |
| Motzer 2015          | 27.0  | 9.6  | OS  | 27.0  | 27.0  | 4                           | 1 | OS  | 4 | 4 | 2.28  | 1.04 |
| Orlowski 2007        | 29.0  | 33.0 | OS  | 29.0  | 29.0  | Not Scored – Hematology RCT |   |     |   |   | 1.29  | 1.76 |
| Palumbo 2016         | NA    | 48.8 | PFS | 48.8  | 48.8  | Not Scored – Hematology RCT |   |     |   |   | NA    | 2.52 |
| Paz-Ares 2013        | 22.0  | 32.0 | PFS | 32.0  | 32.0  | 4                           | 2 | PFS | 2 | 2 | 2.44  | 2.86 |
| Pfisterer 2006       | 4.0   | 22.4 | OS  | 4.0   | 4.0   | 1                           | 3 | PFS | 3 | 3 | 0.59  | 2.16 |
| Posner 2007          | 30.0  | 23.2 | OS  | 30.0  | 30.0  | 4                           | 3 | OS  | 4 | 4 | 7.54  | 8.21 |
| Peters 2017          | 24.0  | 42.4 | OS  | 24.0  | 40.0  | NA                          | 3 | PFS | 3 | 4 | 0.74  | 3.33 |
| Pujade-Lauraine 2014 | 15.0  | 41.6 | PFS | 41.6  | 57.6  | 3                           | 3 | PFS | 3 | 4 | 1.70  | 3.19 |
| Pujade-Lauraine 2017 | NA    | 56.0 | PFS | 56.0  | 72.0  | NA                          | 3 | PFS | 3 | 4 | NA    | 7.28 |
| Raymond 2011         | 59.0  | 46.4 | OS  | 59.0  | 59.0  | NA                          | 3 | PFS | 3 | 4 | 3.13  | 5.62 |
| Reck 2016            | 6.0   | 16.8 | PFS | 16.8  | 16.8  | 1                           | 1 | PFS | 1 | 1 | 1.85  | 3.62 |
| Rittmeyer 2016       | 27.0  | 4.0  | OS  | 27.0  | 47.0  | 4                           | 1 | OS  | 4 | 4 | 2.35  | NA   |
| Rini 2011            | NA    | 26.8 | PFS | 26.8  | 49.5  | NA                          | 3 | PFS | 3 | 4 | NA    | 2.08 |
| Robert 2015          | 31.0  | 35.2 | OS  | 31.0  | 47.0  | 3                           | 3 | OS  | 3 | 3 | 1.48  | 2.41 |
| Robert 2015          | 31.0  | 33.6 | OS  | 31.0  | 47.0  | NA                          | 3 | PFS | 3 | 3 | 1.57  | 1.74 |



|                    |      |      |     |      |      |                             |    |     |    |    |       |       |
|--------------------|------|------|-----|------|------|-----------------------------|----|-----|----|----|-------|-------|
| Ryan 2013          | 19.0 | 37.6 | PFS | 37.6 | 37.6 | 2                           | 3  | OS  | 2  | 2  | 2.05  | 5.03  |
| Rosell 2012        | -4.0 | 50.4 | PFS | 50.4 | 50.4 | 1                           | 3  | PFS | 3  | 4  | NA    | 5.25  |
| Salles 2012        | 13.0 | 36.0 | OS  | 13.0 | 13.0 | Not Scored – Hematology RCT |    |     |    |    | NA    | 6.14  |
| San Miguel 2008    | 39.0 | 41.6 | OS  | 39.0 | 39.0 | Not Scored – Hematology RCT |    |     |    |    | 2.20  | 4.23  |
| San-Miguel 2014    | 13.0 | 29.6 | OS  | 13.0 | 13.0 | Not Scored – Hematology RCT |    |     |    |    | 1.14  | 3.75  |
| Schlumberger 2015  | 38.0 | 63.2 | PFS | 63.2 | 79.2 | NA                          | 3  | PFS | NA | NA | NA    | 10.40 |
| Scher 2012         | 37.0 | 48.0 | OS  | 37.0 | 53.0 | 3                           | 3  | OS  | 3  | 3  | 2.66  | 4.44  |
| Sehn 2016          | 18.0 | 38.4 | OS  | 18.0 | 34.0 | Not Scored – Hematology RCT |    |     |    |    | 2.22  | 6.96  |
| Sequist 2013       | NA   | 33.6 | PFS | 33.6 | 49.6 | NA                          | 3  | PFS | 3  | 3  | NA    | 4.22  |
| Shaw 2013          | -2.0 | 40.8 | PFS | 40.8 | 56.8 | 1                           | 3  | PFS | 3  | 4  | NA    | 3.52  |
| Soria 2017         | 27.0 | 36.0 | PFS | 36.0 | 52.0 | 3                           | 3  | PFS | 3  | 4  | 2.26  | 5.48  |
| Stewart 2014       | 21.0 | 24.8 | OS  | 21.0 | 21.0 | Not Scored – Hematology RCT |    |     |    |    | 2.26  | 4.25  |
| Stone 2017         | 22.0 | NA   | OS  | 22.0 | 22.0 | Not Scored – Hematology RCT |    |     |    |    | 5.90  | NA    |
| Sternberg 2010     | NA   | 43.2 | PFS | 43.2 | 59.2 | NA                          | 3  | PFS | 3  | 4  | NA    | 3.80  |
| Sledge 2017        | NA   | 35.8 | PFS | 35.8 | 51.8 | NA                          | 3  | PFS | 3  | 4  | NA    | 4.28  |
| Schoffski 2016     | 23.0 | 9.6  | OS  | 23.0 | 23.0 | 3                           | 2  | OS  | 3  | 3  | 1.85  | 0.65  |
| Taberero 2015      | 15.6 | 16.6 | OS  | 15.6 | 15.6 | 1                           | 1  | OS  | NA | NA | 1.58  | 1.19  |
| Tewari 2014        | 32.0 | NA   | OS  | 32.0 | NA   | 3                           | NA | OS  | 3  | 3  | 2.25  | NA    |
| Thatcher 2015      | 16.0 | 12.0 | OS  | 16.0 | 16.0 | 1                           | 1  | OS  | 1  | 1  | 1.44  | 0.63  |
| Van Cutsem 2007    | 0.0  | 36.8 | PFS | 36.8 | 36.8 | 1                           | 2  | PFS | 2  | 3  | 0.08  | 3.21  |
| Van Cutsem 2012    | 18.3 | 19.4 | OS  | 18.3 | 18.3 | 1                           | 1  | OS  | 1  | 1  | 2.03  | NA    |
| Van der Graaf 2012 | 14.0 | 55.2 | OS  | 14.0 | 14.0 | 2                           | 3  | PFS | 3  | 3  | 1.19  | 2.78  |
| Van Oers 2015      | 15.0 | 40.0 | OS  | 15.0 | 15.0 | Not Scored – Hematology RCT |    |     |    |    | -0.27 | 5.82  |
| Verma 2012         | 32.0 | 28.0 | OS  | 32.0 | 48.0 | 2                           | 3  | OS  | 2  | 2  | 2.56  | 3.29  |
| Vermorken 2007     | 27.0 | 22.4 | OS  | 27.0 | 27.0 | 4                           | 2  | PFS | 2  | 2  | 4.50  | 3.37  |
| Vermorken 2008     | 20.0 | 36.8 | OS  | 20.0 | 20.0 | 3                           | 3  | OS  | 3  | 3  | 1.66  | 1.91  |
| Von Hoff 2013      | 28.0 | 24.8 | OS  | 28.0 | 44.0 | 2                           | 3  | OS  | 2  | 2  | 1.83  | 1.27  |

|                  |      |      |     |      |      |    |   |     |   |   |      |      |
|------------------|------|------|-----|------|------|----|---|-----|---|---|------|------|
| Wang-gillam 2016 | 33.0 | 35.2 | OS  | 33.0 | 53.0 | 2  | 3 | OS  | 2 | 2 | 1.50 | 1.75 |
| Weber 2015       | NA   | 14.4 | PFS | 14.4 | 14.4 | NA | 2 | PFS | 2 | 2 | NA   | 0.76 |
| Wells 2012       | 11.0 | 43.2 | OS  | 11.0 | 11.0 | NA | 3 | PFS | 3 | 4 | 0.79 | 4.89 |
| Yao 2016         | 36.0 | 41.6 | OS  | 36.0 | 52.0 | NA | 3 | PFS | 3 | 4 | 2.04 | 3.91 |
| Wilke 2014       | 19.3 | 29.2 | OS  | 19.3 | 19.3 | 2  | 3 | OS  | 2 | 2 | 1.34 | 1.86 |

ASCO-CBS, ASCO Clinical Benefit Score; ESMO-PMCBG, ESMO Preliminary Magnitude of Clinical Benefit Grade; RMST, Restricted Mean Survival Time; OS, Overall survival; PFS, Progression-free survival; TOC, Tail of Curve Bonus (ASCO) or Long-term plateau (ESMO); NA, Not Applicable – these values were either not reported or could not be calculated. Framework endpoints represent the endpoints that were used to score the study using each framework (not necessarily the primary endpoint of the study). When calculating ASCO scores, if the reported HR in the trial was greater than 1, the ASCO score would be negative. Despite this negative score, these trials were used for drug approvals since the endpoints used for scoring in this analysis may not correspond to the endpoint used by the FDA in the approval process.

**eTable 3. Mean RMST Differences (Months) for ESMO-PMCBGs Ranging From 1 to 4**

| ESMO-PMCBG | OS   | PFS  | Framework | Framework + TOC |
|------------|------|------|-----------|-----------------|
| 1          | 1.19 | 1.21 | 1.64      | 1.47            |
| 2          | 1.69 | 1.84 | 2.02      | 2.21            |
| 3          | 1.94 | 3.51 | 3.13      | 2.18            |
| 4          | 3.34 | NA   | 3.43      | 3.96            |

ESMO-PMCBGs, ESMO Preliminary Magnitude of Clinical Benefit Grades; OS, Overall Survival; PFS, Progression free survival; TOC, Tail-of-curve bonus (ASCO) or long term plateau (ESMO); NA, Not Applicable – No studies had a ESMO-PMCBG (PFS only) of 4. Endpoints used to calculate ESMO-PMCBGs are presented in the first row.

**eTable 4. ICC Values**

| <b>Endpoint</b>     | <b>ICC (95 % CI)</b> |
|---------------------|----------------------|
| ASCO OS             | 0.94 (0.91 – 0.96)   |
| ASCO PFS            | 0.98 (0.97 – 0.99)   |
| ASCO FR             | 0.82 (0.74 – 0.87)   |
| ASCO FR + TOC       | 0.82 (0.74 – 0.87)   |
| ESMO OS             | 0.96 (0.94 – 0.98)   |
| ESMO PFS            | 0.90 (0.84 – 0.93)   |
| ESMO FR             | 0.84 (0.76 – 0.90)   |
| ESMO FR + TOC       | 0.72 (0.60 – 0.82)   |
| RMST difference OS  | 0.96 (0.95 – 0.98)   |
| RMST difference PFS | 0.94 (0.91 – 0.96)   |

ICC, Intraclass Correlation Coefficient; OS, Overall Survival; PFS, Progression-free Survival; FR, Framework defined endpoint; FR + TOC, Framework defined endpoint + Tail of curve bonus; RMST, Restricted Mean Survival Time.

**eTable 5. Primary Analysis With OS and PFS Data Split**

| <b>OS Comparison</b>     | <b>Spearman Correlation (95% CI)</b> |
|--------------------------|--------------------------------------|
| ASCO-CBS vs HR           | -1                                   |
| ASCO-CBS + TOC vs HR     | -0.90 (-0.96, -0.81)                 |
| ASCO-CBS vs mOS          | 0.44 (0.10, 0.64)                    |
| ASCO-CBS + TOC vs mOS    | 0.23 (-0.02, 0.49)                   |
| ASCO-CBS vs RMST         | 0.52 (0.28, 0.70)                    |
| ASCO-CBS + TOC vs RMST   | 0.44 (0.20, 0.64)                    |
| ESMO-PMCBG vs HR         | -0.32 (-0.56, -0.02)                 |
| ESMO-PMCBG + TOC vs HR   | -0.32 (-0.58, -0.02)                 |
| ESMO-PMCBG vs mOS        | 0.71 (0.35, 0.88)                    |
| ESMO-PMCBG + TOC vs mOS  | 0.71 (0.37, 0.87)                    |
| ESMO-PMCBG vs RMST       | 0.56 (0.33, 0.73)                    |
| ESMO-PMCBG + TOC vs RMST | 0.56 (0.27, 0.73)                    |
| <b>PFS Comparison</b>    | <b>Spearman Correlation (95% CI)</b> |
| ASCO-CBS vs HR           | -1                                   |
| ASCO-CBS + TOC vs HR     | -0.88 (-0.94, -0.79)                 |
| ASCO-CBS vs mPFS         | 0.42 (0.08, 0.67)                    |
| ASCO-CBS + TOC vs mPFS   | 0.42 (0.09, 0.67)                    |
| ASCO-CBS vs RMST         | 0.34 (-0.02, 0.63)                   |
| ASCO-CBS + TOC vs RMST   | 0.33 (-0.03, 0.62)                   |
| ESMO-PMCBG vs HR         | -0.55 (-0.73, -0.31)                 |
| ESMO-PMCBG + TOC vs HR   | -0.37 (-0.61, 0.06)                  |
| ESMO-PMCBG vs mPFS       | 0.55 (0.36, 0.72)                    |
| ESMO-PMCBG + TOC vs mPFS | 0.71 (0.49, 0.83)                    |
| ESMO-PMCBG vs RMST       | 0.33 (0.02, 0.58)                    |
| ESMO-PMCBG + TOC vs RMST | 0.70 (0.45, 0.84)                    |

ASCO-CBS, ASCO Clinical Benefit Score; HR, Hazard Ratio; TOC, Tail-of-curve bonus; RMST, Restricted Mean Survival Time; mOS, median overall survival difference; mPFS, median progression-free survival difference; OS, overall survival; PFS, progression-free survival.

**eFigure 1. Distribution of ASCO-CBS**

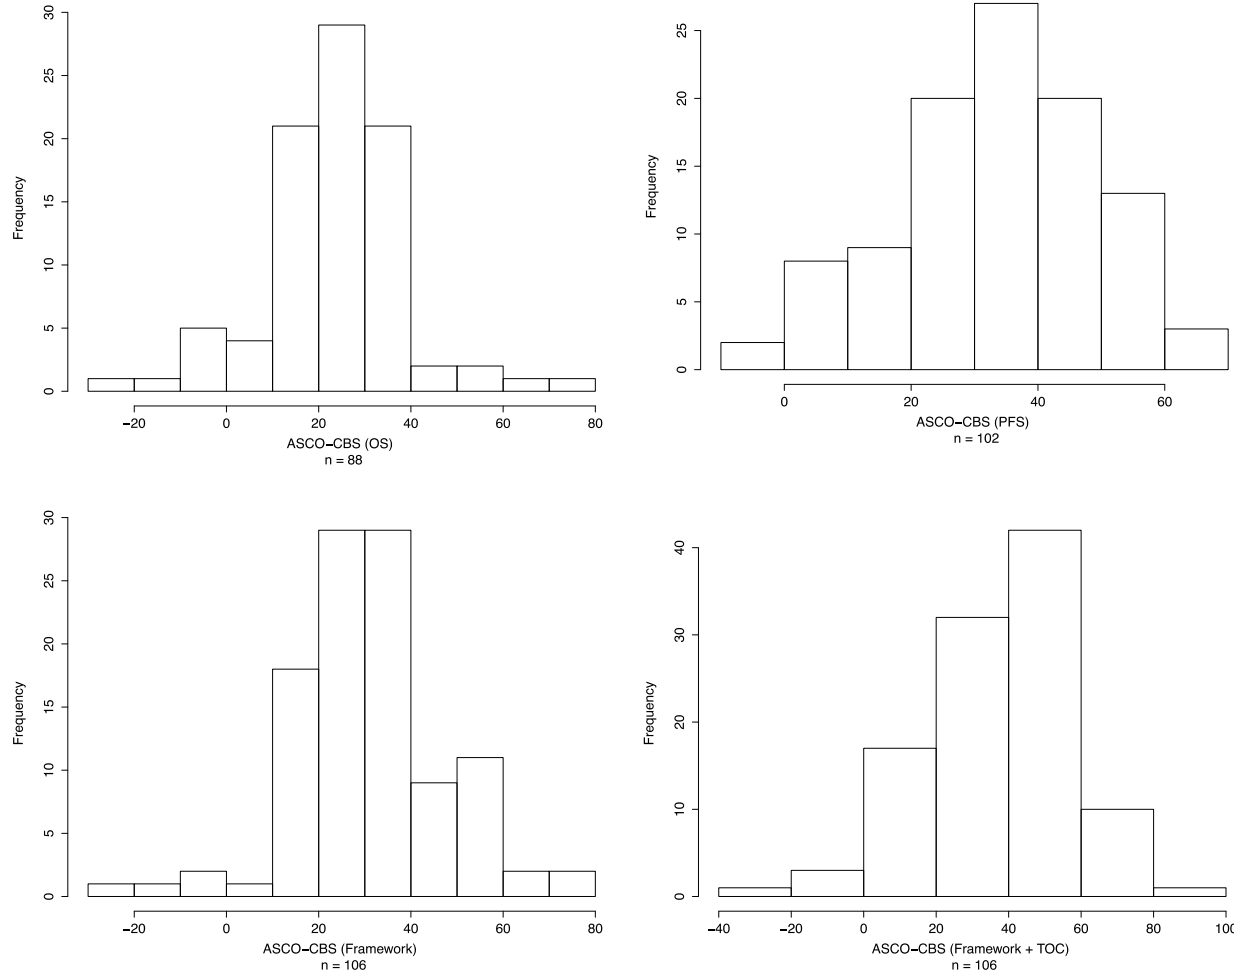

ASCO-CBS, ASCO Clinical Benefit Score; OS, Overall Survival; PFS, Progression-free Survival; TOC, Tail of Curve bonus. The number of scored studies using each endpoint are listed below each histogram (n). Framework represents studies scored using the ASCO framework criteria.

**eFigure 2. Distribution of ESMO-PMCBG**

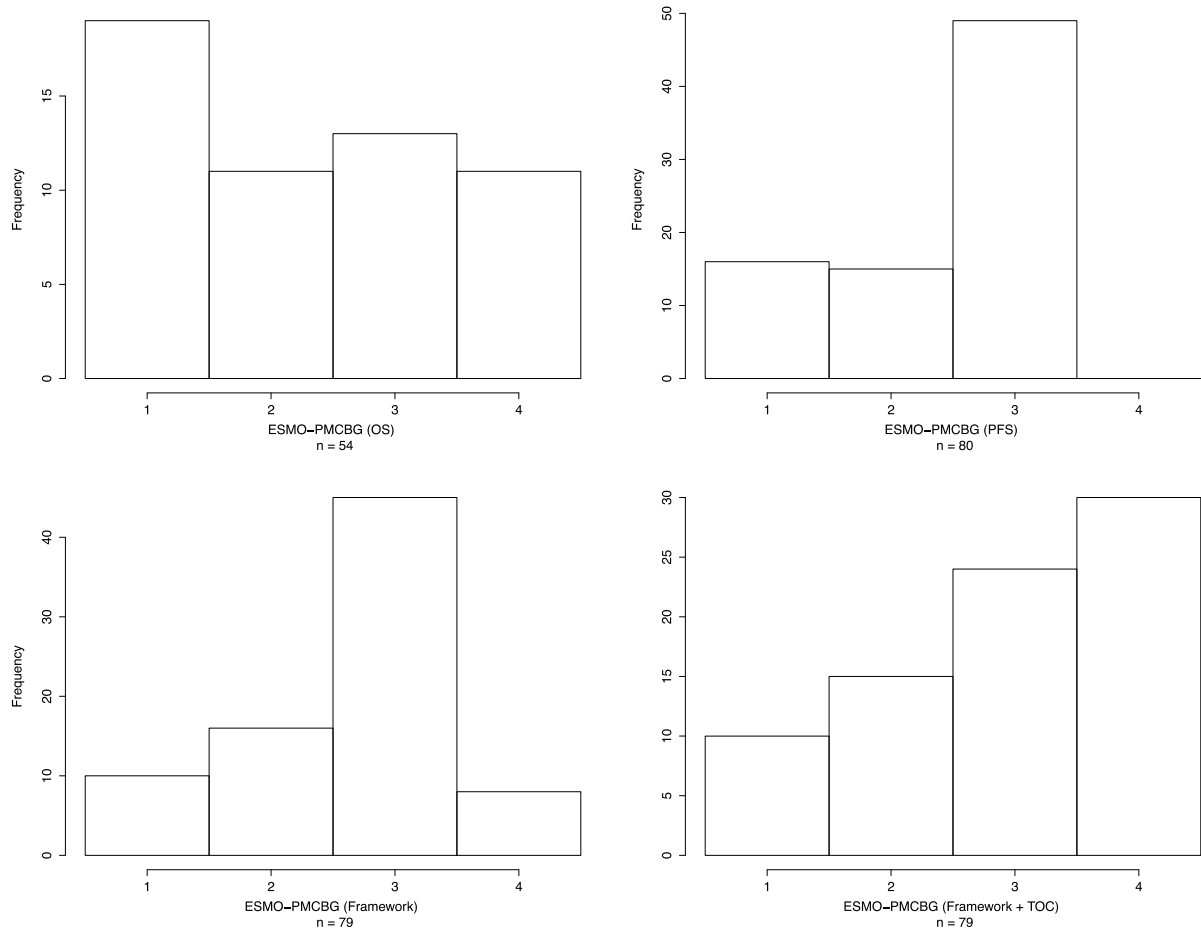

ESMO-PMCBG, ESMO Preliminary Magnitude of Clinical Benefit Grade; OS, Overall Survival; PFS, Progression-free Survival; TOC, Tail of Curve bonus. The number of scored studies using each endpoint are listed below each histogram (n). Framework represents studies scored using the ESMO framework criteria.

**eFigure 3. Spearman Correlations of ASCO Clinical Benefit Score (ASCO-CBS) and ESMO Preliminary Magnitude of Clinical Benefit Grade (ESMO-PMCBG) vs Median Survival Difference**

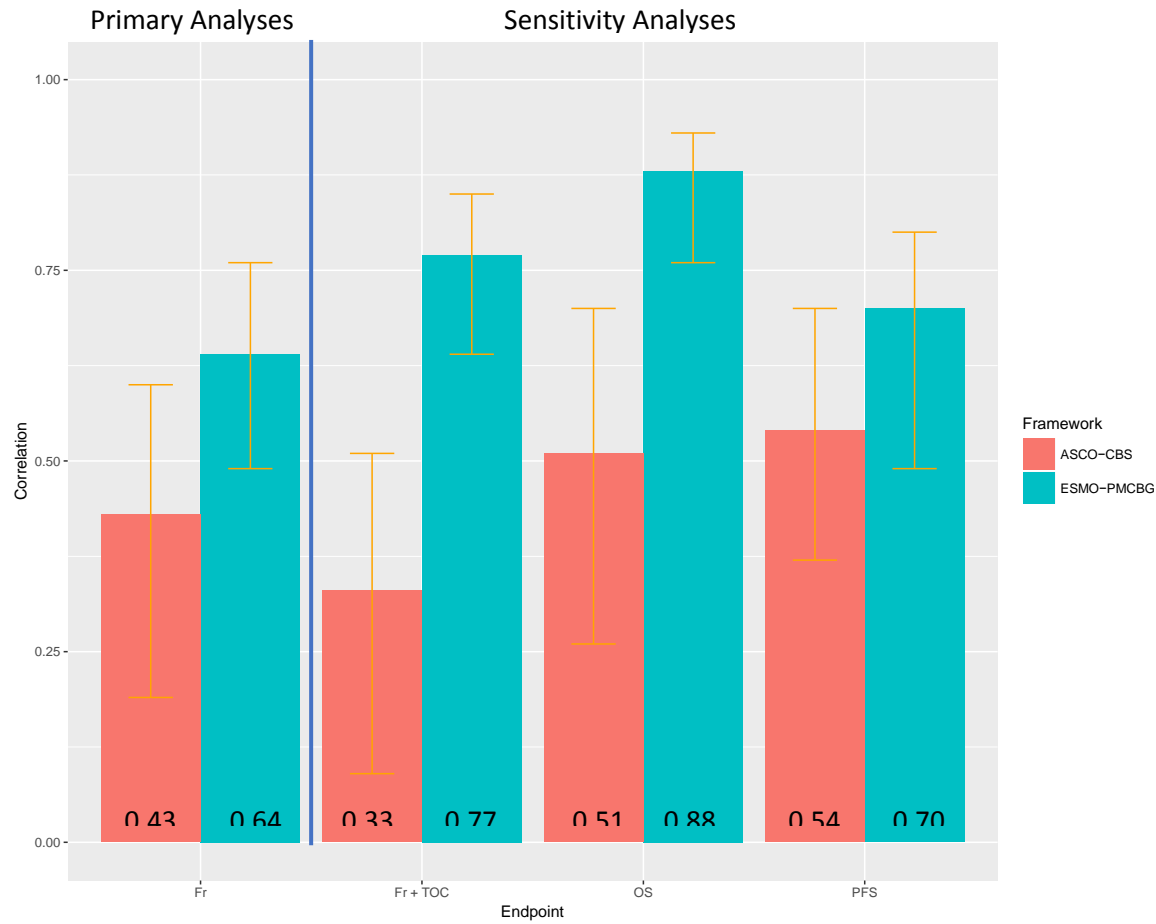

Spearman correlations of ASCO Clinical Benefit Score (ASCO-CBS) and ESMO Preliminary Magnitude of Clinical Benefit Grade (ESMO-PMCBG) versus median survival difference. The values shown in each bar represent the point estimate of the spearman correlation. 95% confidence intervals are also illustrated on the graph. Fr, Framework defined endpoint; Fr + TOC, Framework defined endpoint including Tail-of-Curve bonus; OS, Overall Survival; PFS, Progression-free Survival.
